# Supplementary material for: A combined crystallographic and theoretical investigation of noncovalent interactions in 1,3,4-oxadiazole-2-thione-N-Mannich derivatives: in vitro bioactivity and molecular docking
Source: Royal Society of Chemistry journal article supplement (doi:10.1039/d3ra07169c), 2023-01-01
Supplement: d3ra07169c1.pdf [file d3ra07169c1.pdf]

**A combined experimental and theoretical investigation of noncovalent interactions in 1,3,4-oxadiazole-2-thione-*N*-Mannich derivatives: *in vitro* bioactivity and molecular docking**

**Lamya H. Al-Wahaibi,<sup>a</sup> Kowsalya Alagappan,<sup>b</sup> Rosa M. Gomila,<sup>c</sup> Olivier Blacque,<sup>d</sup> Antonio Frontera,<sup>\*c</sup> M. Judith Percino,<sup>e</sup> Ali A. El-Emam,<sup>\*f</sup> and Subbiah Thamotharan<sup>\*b</sup>**

<sup>a</sup> *Department of Chemistry, College of Sciences, Princess Nourah bint Abdulrahman University, Riyadh 11671, Saudi Arabia*

<sup>b</sup> *Biomolecular Crystallography Laboratory and DBT-BIC Center, School of Chemical and Biotechnology, SASTRA Deemed University, Thanjavur-613 401, India*

<sup>c</sup> *Departament de Química, Universitat de les Illes Balears, Ctra. de Valldemossa km 7.5, 07122 Palma de Mallorca, Balears, Spain*

<sup>d</sup> *Department of Chemistry, University of Zurich, Winterthurerstrasse 190, 8057 Zurich, Switzerland*

<sup>e</sup> *Unidad de Polímeros y Electrónica Orgánica, Instituto de Ciencias, Benemérita Universidad Autónoma de Puebla, Val3-Ecocampus Valsequillo, Independencia O2 Sur 50, San Pedro Zacachimalpa, Puebla 72960, CP, México*

<sup>f</sup> *Department of Medicinal Chemistry, Faculty of Pharmacy, Mansoura University, Mansoura 35516, Egypt*

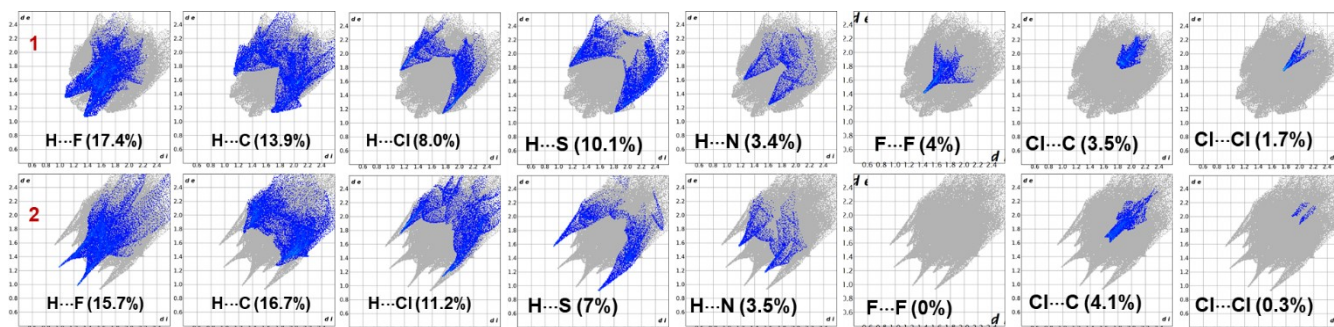

**Fig. S1** 2D-fingerprint plots showing the relative contribution of selected intermolecular interactions observed in **1** and **2**.

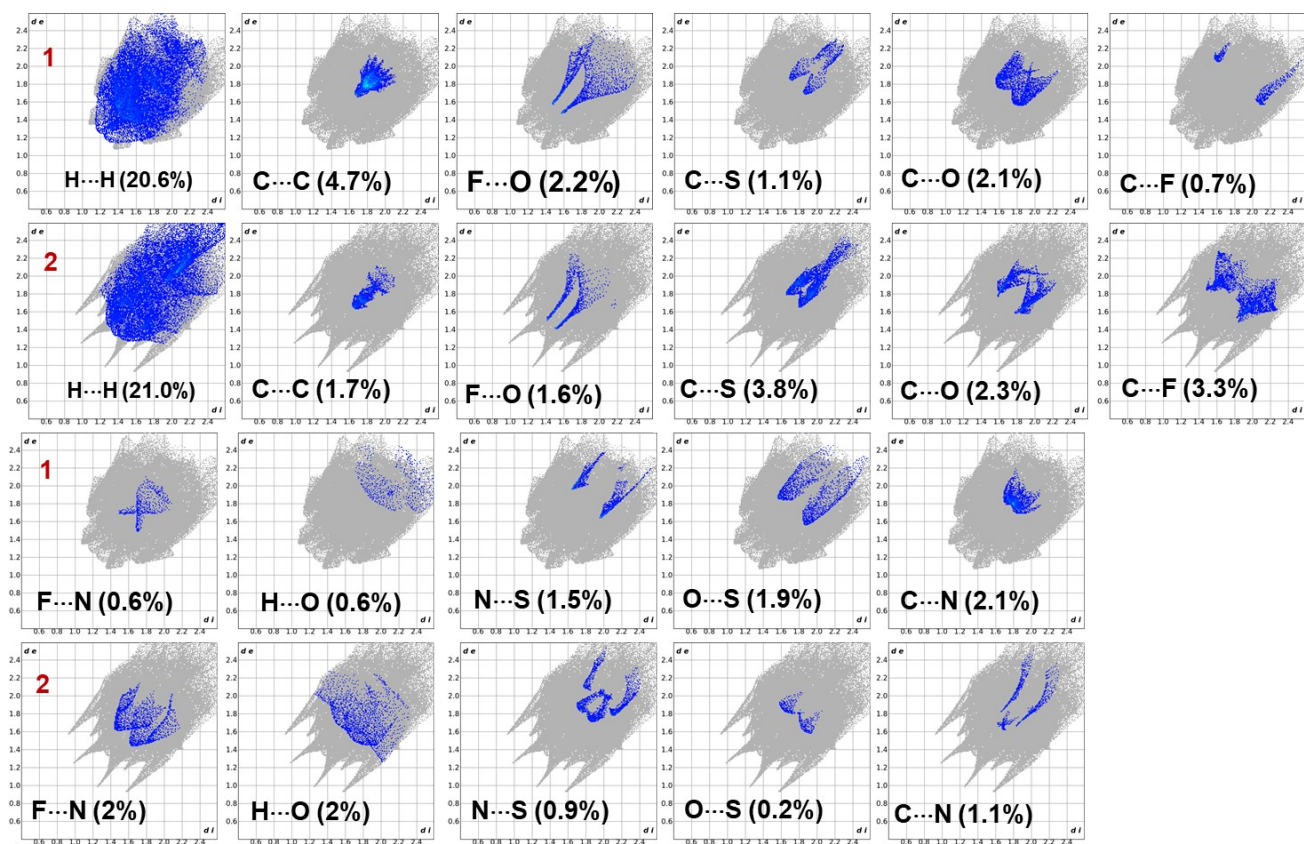

**Fig. S2** 2D-fingerprint plots showing the relative contribution of selected intermolecular interactions observed in **1** and **2**.

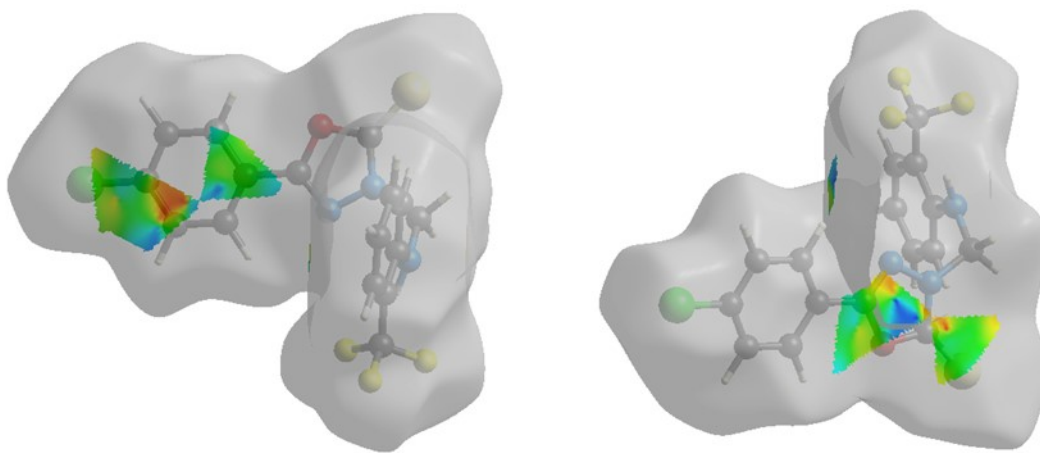

**Fig. S3** Two different views of shape index diagram showing the red-blue triangles over the surface of the rings A and B in **1**.

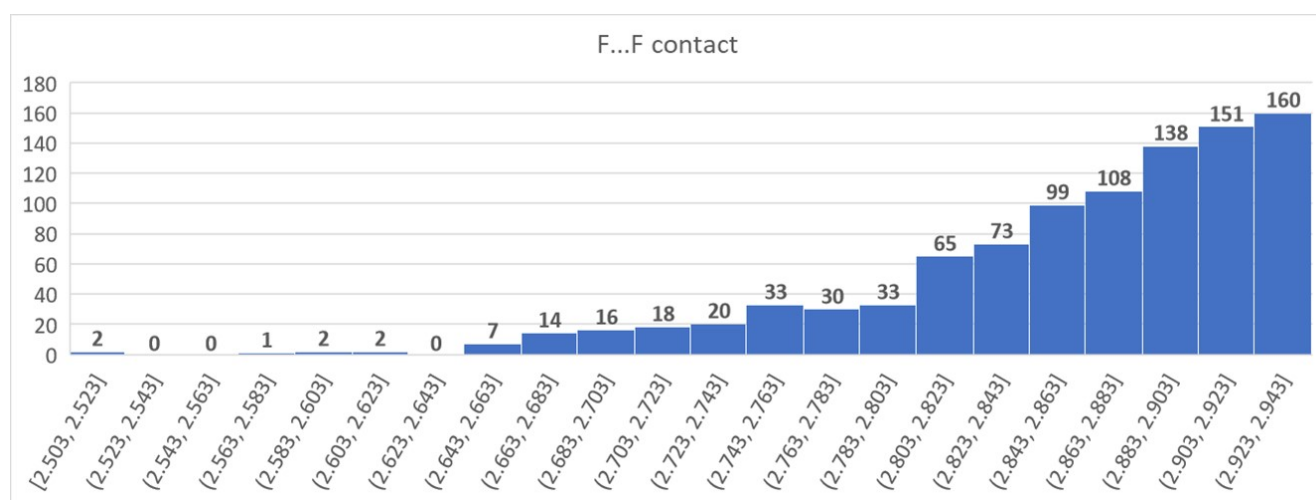

**Fig. S4** Distribution of C-F...F-C contacts observed in structures deposited in CSD.

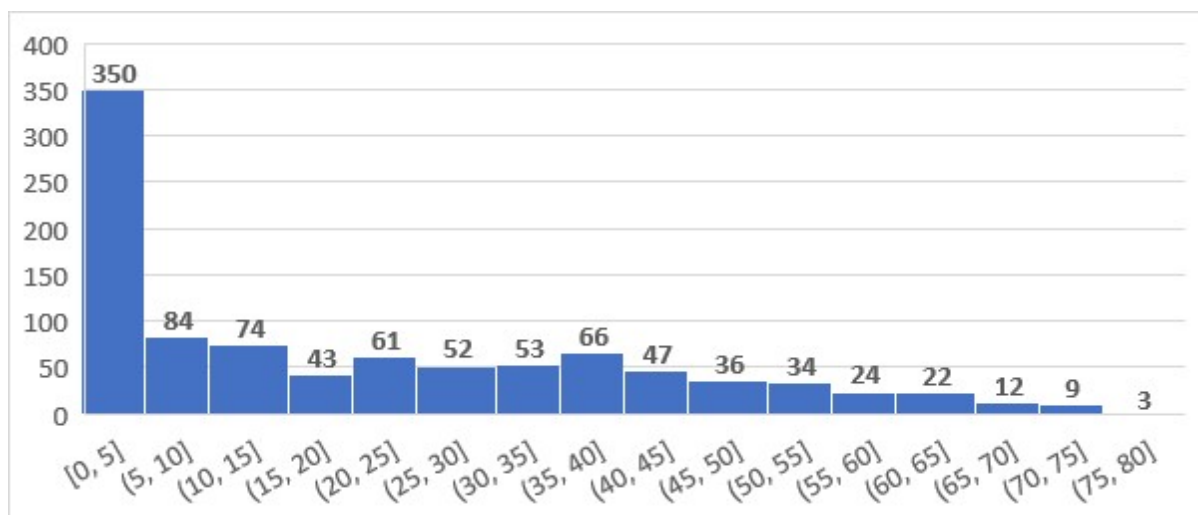

**Fig. S5** Distribution of  $|\theta_1 - \theta_2|$  angles for the C-F...F-C contacts observed in structures deposited in CSD.

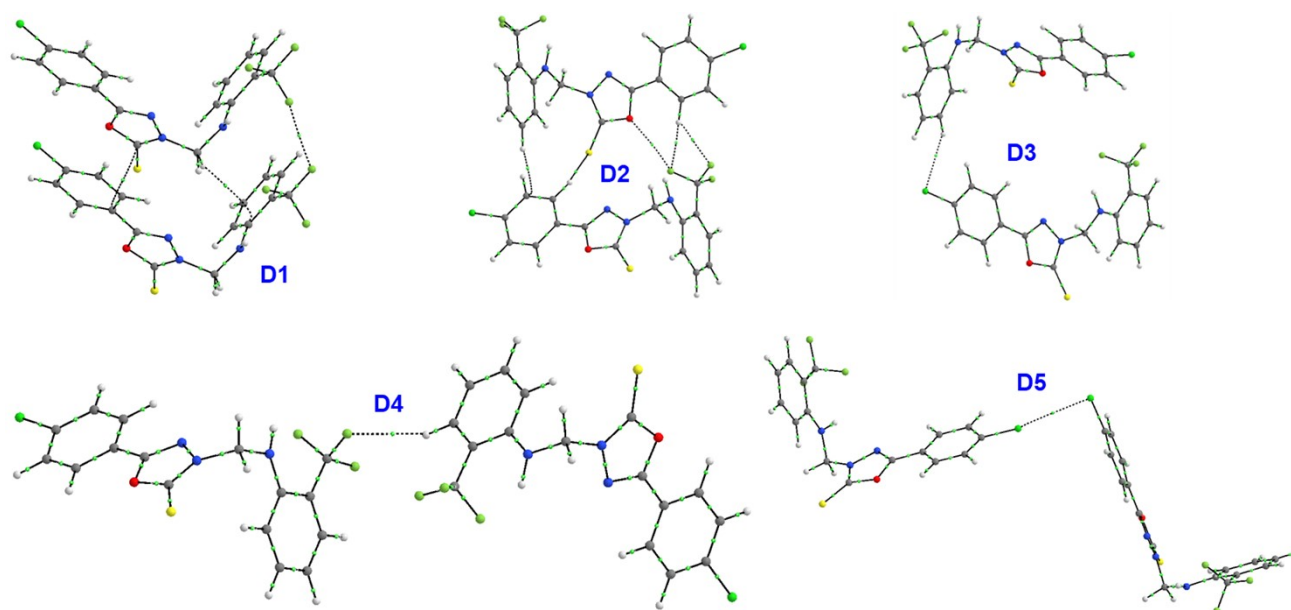

**Fig. S6** Molecular graphs of molecular dimers of **1** showing bond critical points for intermolecular interactions.

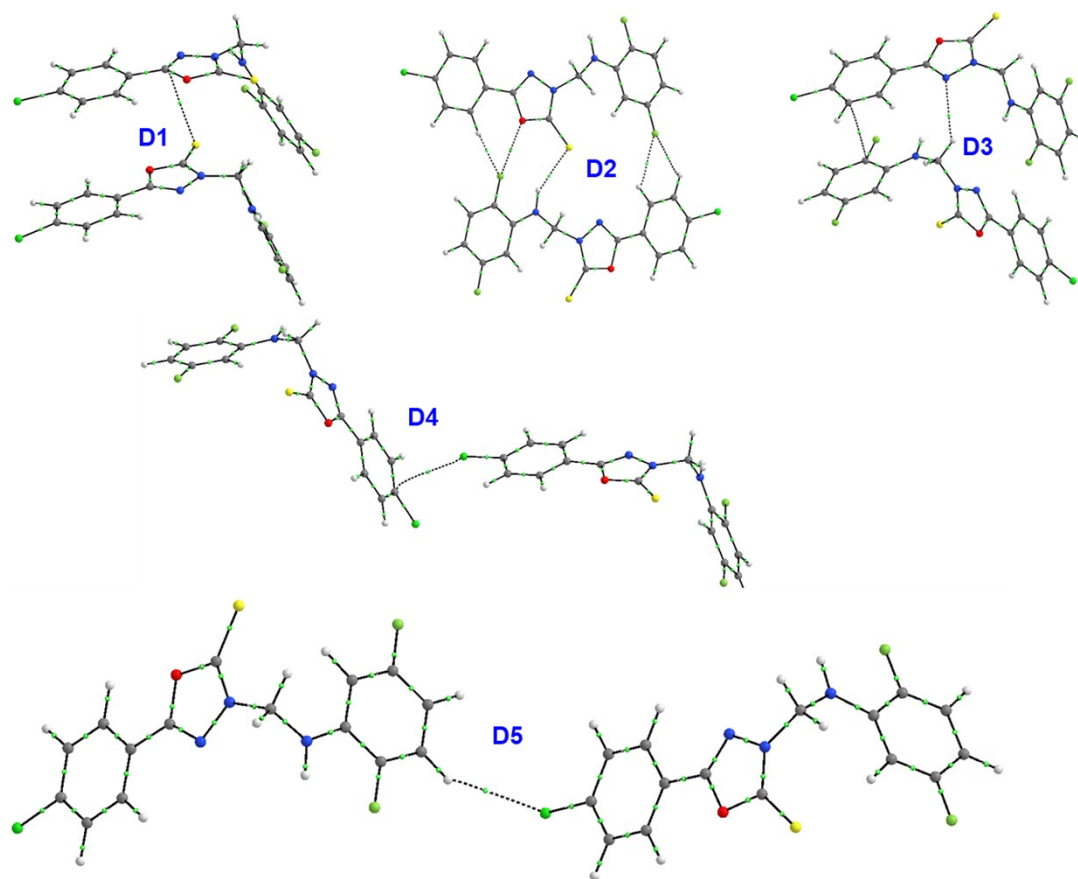

**Fig. S7** Molecular graphs of molecular dimers of **2** showing bond critical points for intermolecular interactions.

**Table S1** Topological parameters for selected intermolecular interactions in different dimers of compounds **1** and **2**.  $R_{ij}$ , Bond path (Å);  $\rho(r)$ , Electron density ( $e \text{ \AA}^{-3}$ );  $\nabla^2\rho(r)$ , Laplacian of electron density ( $e \text{ \AA}^{-5}$ );  $V(r)$ , Potential electron density ( $\text{kJ mol}^{-1} \text{ br}^{-3}$ );  $G(r)$ , Kinetic electron density ( $\text{kJ mol}^{-1} \text{ br}^{-3}$ );  $H(r)$ , Total electronic energy density ( $\text{kJ mol}^{-1} \text{ br}^{-3}$ );  $D_e$ , Dissociation energy ( $\text{kcal mol}^{-1}$ ).

| Interaction           | $R_{ij}$ | $\rho(r)$ | $\nabla^2\rho(r)$ | $V(r)$ | $G(r)$ | $H(r)$ | $ -V(r)/G(r) $ | $D_e$ |
|-----------------------|----------|-----------|-------------------|--------|--------|--------|----------------|-------|
| <b>Compound 1</b>     |          |           |                   |        |        |        |                |       |
| <b>D1</b>             |          |           |                   |        |        |        |                |       |
| C8...C4               | 3.447    | 0.039     | 0.437             | -7.3   | 9.6    | 2.3    | 0.76           | 0.9   |
| C9-H9B...Cg3          | 3.139    | 0.039     | 0.464             | -7.6   | 10.1   | 2.5    | 0.75           | 0.9   |
| C16-F1...F2-C16       | 2.838    | 0.042     | 0.841             | -10.9  | 16.9   | 6.0    | 0.65           | 1.3   |
| <b>D2</b>             |          |           |                   |        |        |        |                |       |
| C12-H12...C2( $\pi$ ) | 2.988    | 0.043     | 0.443             | -7.7   | 9.9    | 2.2    | 0.78           | 0.9   |
| C3-H3...S1            | 3.017    | 0.046     | 0.460             | -7.8   | 10.1   | 2.4    | 0.77           | 0.9   |
| C6-H6...F2            | 3.057    | 0.031     | 0.545             | -6.8   | 10.8   | 4.0    | 0.63           | 0.8   |
| C5-H5...F3            | 2.442    | 0.053     | 0.758             | -11.3  | 16.0   | 4.7    | 0.71           | 1.4   |
| C5-H5...F1            | 2.462    | 0.056     | 0.824             | -12.6  | 17.5   | 4.9    | 0.72           | 1.5   |
| <b>D3</b>             |          |           |                   |        |        |        |                |       |
| C12-H12...C11         | 2.932    | 0.045     | 0.500             | -8.1   | 10.9   | 2.8    | 0.75           | 1.0   |
| <b>D4</b>             |          |           |                   |        |        |        |                |       |
| C14-H14...F1          | 2.625    | 0.038     | 0.543             | -8.0   | 11.4   | 3.4    | 0.70           | 1.0   |
| <b>D5</b>             |          |           |                   |        |        |        |                |       |
| C1-C11...C11          | 3.532    | 0.041     | 0.533             | -7.3   | 10.9   | 3.6    | 0.67           | 0.9   |
| <b>Compound 2</b>     |          |           |                   |        |        |        |                |       |
| <b>D1</b>             |          |           |                   |        |        |        |                |       |
| S1...C7               | 3.513    | 0.047     | 0.500             | -9.0   | 11.3   | 2.3    | 0.79           | 1.1   |
| <b>D2</b>             |          |           |                   |        |        |        |                |       |
| C3-H3...F1            | 2.251    | 0.074     | 1.162             | -17.3  | 24.5   | 7.2    | 0.71           | 2.1   |
| C11-F1...O1           | 2.925    | 0.040     | 0.764             | -10.0  | 15.4   | 5.4    | 0.65           | 1.2   |
| N3-H3A...S1           | 2.524    | 0.105     | 0.980             | -18.6  | 22.6   | 4.1    | 0.82           | 2.2   |
| C5-H5...F2            | 2.594    | 0.040     | 0.642             | -9.3   | 13.4   | 4.1    | 0.69           | 1.1   |
| C6-H6...F2            | 2.663    | 0.035     | 0.569             | -8.1   | 11.8   | 3.7    | 0.69           | 1.0   |
| <b>D3</b>             |          |           |                   |        |        |        |                |       |
| C11...C6              | 3.358    | 0.044     | 0.456             | -8.0   | 10.2   | 2.2    | 0.79           | 1.0   |
| C9-H9A...N1           | 2.760    | 0.043     | 0.476             | -8.0   | 10.5   | 2.5    | 0.76           | 1.0   |
| <b>D4</b>             |          |           |                   |        |        |        |                |       |
| C1-C11...C6( $\pi$ )  | 3.389    | 0.050     | 0.626             | -9.2   | 13.5   | 3.6    | 0.74           | 1.2   |
| <b>D5</b>             |          |           |                   |        |        |        |                |       |
| C12-H12...C11         | 2.920    | 0.041     | 0.450             | -7.1   | 9.7    | 2.6    | 0.74           | 0.9   |
